# Supplementary material for: Breast cancer survival predicted by TP53 mutation status differs markedly depending on treatment
Source: Springer Nature journal article supplement (doi:10.1186/s13058-018-1044-5), 2018-10-01
Supplement: MOESM2 [file 16165382]

All patients

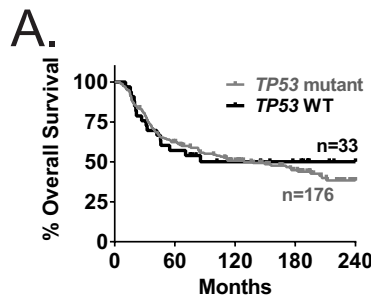

All patients Basal  
Survival: Log-rank p=0.83; Wilcoxon p<0.92

|             | TP53 WT     | TP53 mut    | p-value |
|-------------|-------------|-------------|---------|
| n           | 33          | 176         |         |
| Grade       | 2.77+/-0.10 | 2.92+/-0.02 | p<0.05  |
| Tumor Stage | 1.48+/-0.13 | 1.87+/-0.04 | p<0.05  |
| Tumor Size  | 25.0+/-1.5  | 30.0+/-1.5  | p=0.16  |
| NPI         | 4.23+/-0.23 | 4.67+/-0.06 | p<0.05  |

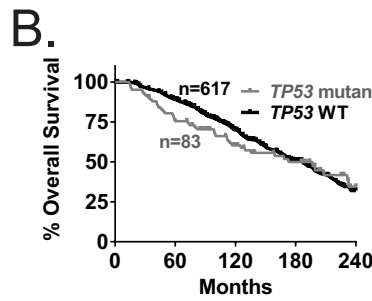

All patients Luminal A  
Survival: Log-rank p=0.5; Wilcoxon p=0.08

|             | TP53 WT     | TP53 mut    | p-value  |
|-------------|-------------|-------------|----------|
| n           | 617         | 83          |          |
| Grade       | 2.02+/-0.03 | 2.5+/-0.07  | p<0.0001 |
| Tumor Stage | 1.48+/-0.02 | 1.70+/-0.07 | p=0.38   |
| Tumor Size  | 21.8+/-0.4  | 24.8+/-1.38 | p=0.51   |
| NPI         | 3.52+/-0.04 | 4.18+/-0.11 | p<0.0001 |

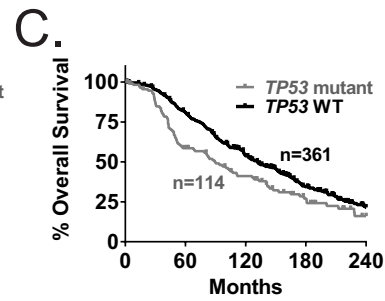

All patients Luminal B  
Survival: Log-rank p<0.005; Wilcoxon p<0.0001

|             | TP53 WT     | TP53 mut    | p-value |
|-------------|-------------|-------------|---------|
| n           | 361         | 114         |         |
| Grade       | 2.47+/-0.03 | 2.64+/-0.04 | p<0.005 |
| Tumor Stage | 1.79+/-0.03 | 1.88+/-0.06 | p=0.26  |
| Tumor Size  | 27.5+/-0.79 | 27.5+/-1.2  | p=0.99  |
| NPI         | 4.11+/-0.06 | 4.36+/-0.08 | p<0.05  |

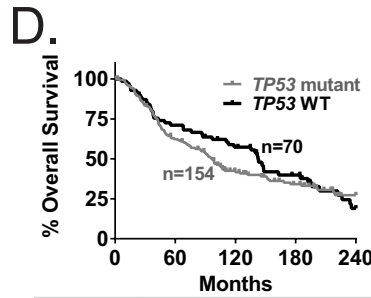

All patients Her2  
Survival: Log-rank p=0.51; Wilcoxon p=0.22

|             | TP53 WT     | TP53 mut    | p-value |
|-------------|-------------|-------------|---------|
| n           | 70          | 154         |         |
| Grade       | 2.56+/-0.07 | 2.78+/-0.03 | p<0.005 |
| Tumor Stage | 1.98+/-0.07 | 1.86+/-0.05 | p=0.3   |
| Tumor Size  | 30.7+/-1.99 | 28.4+/-1.48 | p=0.39  |
| NPI         | 4.33+/-0.13 | 4.51+/-0.09 | p=0.28  |

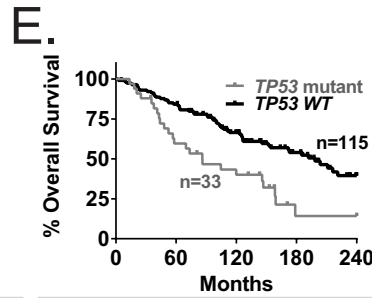

All patients Normal  
Survival: Log-rank p<0.005; Wilcoxon p<0.05

|             | TP53 WT     | TP53 mut    | p-value  |
|-------------|-------------|-------------|----------|
| n           | 115         | 33          |          |
| Grade       | 2.14+/-0.05 | 2.63+/-0.09 | p<0.0001 |
| Tumor Stage | 1.65+/-0.06 | 1.83+/-0.10 | p=0.26   |
| Tumor Size  | 28.2+/-1.77 | 23.5+/-2.6  | p=0.19   |
| NPI         | 3.56+/-0.10 | 4.41+/-0.15 | p<0.0001 |

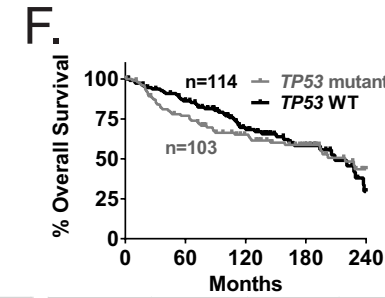

All patients Claudin low  
Survival: Log-rank p=0.07; Wilcoxon p=0.20

|             | TP53 WT     | TP53 mut    | p-value  |
|-------------|-------------|-------------|----------|
| n           | 114         | 103         |          |
| Grade       | 2.30+/-0.07 | 2.88+/-0.03 | p<0.0001 |
| Tumor Stage | 1.61+/-0.07 | 1.81+/-0.06 | p=0.06   |
| Tumor Size  | 22.7+/-1.6  | 25.9+/-1.5  | p=0.15   |
| NPI         | 3.71+/-0.13 | 4.62+/-0.09 | p<0.0001 |

Hormone therapy Rx patients

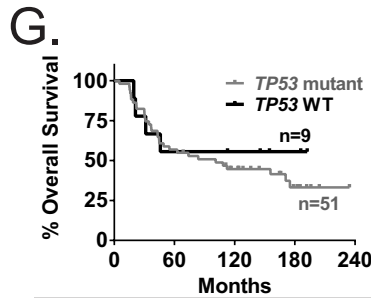

Hormone therapy Basal  
Survival: Log-rank p=0.5; Wilcoxon p=0.7

|             | TP53 WT     | TP53 mut    | p-value |
|-------------|-------------|-------------|---------|
| n           | 9           | 51          |         |
| Grade       | 2.67+/-0.23 | 2.92+/-0.04 | p=0.06  |
| Tumor Stage | 1.83+/-0.14 | 1.93+/-0.08 | p=0.7   |
| Tumor Size  | 27.0+/-3.3  | 31.5+/-2.38 | p=0.44  |
| NPI         | 4.50+/-0.38 | 4.71+/-0.11 | p=0.5   |

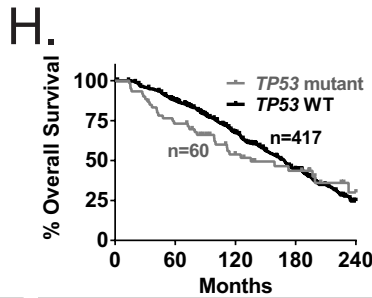

Hormone therapy Luminal A  
Survival: Log-rank p=0.4; Wilcoxon p=0.03

|             | TP53 WT     | TP53 mut    | p-value  |
|-------------|-------------|-------------|----------|
| n           | 417         | 60          |          |
| Grade       | 2.08+/-0.03 | 2.58+/-0.07 | p<0.0001 |
| Tumor Stage | 1.82+/-0.03 | 1.85+/-0.08 | p=0.7    |
| Tumor Size  | 25.4+/-0.66 | 26.6+/-1.61 | p=0.5    |
| NPI         | 3.81+/-0.05 | 4.47+/-0.12 | p<0.05   |

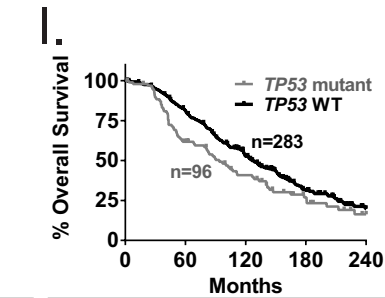

Hormone therapy Luminal B  
Survival: Log-rank p=0.03; Wilcoxon p<0.005

|             | TP53 WT     | TP53 mut    | p-value |
|-------------|-------------|-------------|---------|
| n           | 283         | 96          |         |
| Grade       | 2.51+/-0.03 | 2.71+/-0.05 | p<0.005 |
| Tumor Stage | 1.89+/-0.03 | 1.90+/-0.06 | p=0.8   |
| Tumor Size  | 28.4+/-0.87 | 27.9+/-1.43 | p=0.8   |
| NPI         | 4.3+/-0.06  | 4.49+/-0.08 | p=0.1   |

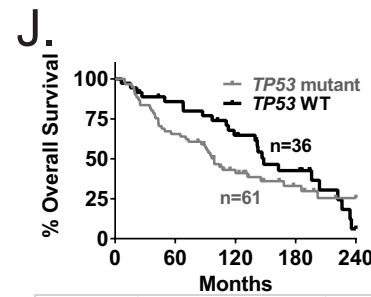

Hormone therapy Her2  
Survival: Log-rank p=0.3; Wilcoxon p<0.05

|             | TP53 WT     | TP53 mut    | p-value |
|-------------|-------------|-------------|---------|
| n           | 36          | 61          |         |
| Grade       | 2.53+/-0.10 | 2.75+/-0.06 | p<0.05  |
| Tumor Stage | 2.0+/-0.07  | 2.09+/-0.08 | p=0.6   |
| Tumor Size  | 30.0+/-2.39 | 32.0+/-3.0  | p=0.6   |
| NPI         | 4.42+/-0.18 | 4.59+/-0.14 | p=0.5   |

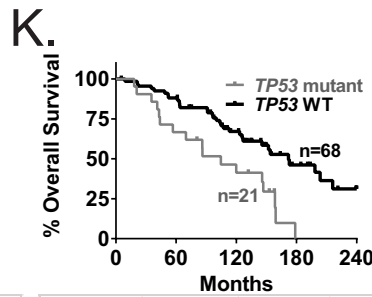

Hormone therapy Normal  
Survival: Log-rank p<0.005; Wilcoxon p<0.05

|             | TP53 WT     | TP53 mut    | p-value  |
|-------------|-------------|-------------|----------|
| n           | 68          | 21          |          |
| Grade       | 2.11+/-0.07 | 2.71+/-0.10 | p<0.0001 |
| Tumor Stage | 1.85+/-0.08 | 1.87+/-0.14 | p=0.9    |
| Tumor Size  | 29.6+/-2.0  | 20.5+/-1.78 | p<0.05   |
| NPI         | 3.69+/-0.12 | 4.61+/-0.19 | p<0.005  |

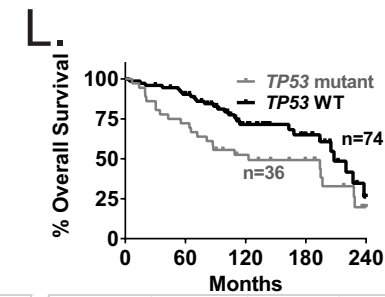

Hormone therapy Claudin low  
Survival: Log-rank p<0.05; Wilcoxon p<0.05

|             | TP53 WT     | TP53 mut    | p-value  |
|-------------|-------------|-------------|----------|
| n           | 74          | 36          |          |
| Grade       | 2.20+/-0.09 | 2.82+/-0.06 | p<0.0001 |
| Tumor Stage | 1.69+/-0.07 | 1.77+/-0.11 | p=0.6    |
| Tumor Size  | 23.2+/-2.0  | 23.5+/-2.10 | p=0.9    |
| NPI         | 3.78+/-0.14 | 4.63+/-0.17 | p<0.005  |
