# Supplementary material for: Breast cancer survival predicted by TP53 mutation status differs markedly depending on treatment
Source: Springer Nature journal article supplement (doi:10.1186/s13058-018-1044-5), 2018-10-01
Supplement: MOESM3 [file 16165382]

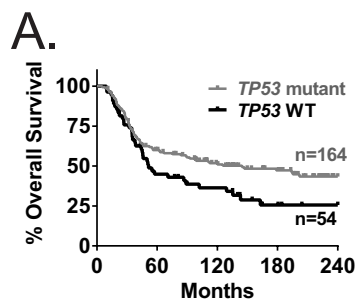

| Chemo/Rad treated, ER-                         |               |               |         |
|------------------------------------------------|---------------|---------------|---------|
| Survival: Log-rank p=0.0275; Wilcoxon p=0.0795 |               |               |         |
|                                                | TP53 WT       | TP53 mut      | p-value |
| n                                              | 54            | 164           |         |
| Grade                                          | 2.89 +/- 0.04 | 2.93 +/- 0.02 | p=0.3   |
| Tumor Stage                                    | 2.33 +/- 0.07 | 2.14 +/- 0.04 | <0.05   |
| Tumor Size                                     | 35.9 +/- 2.9  | 30.6 +/- 1.6  | p=0.1   |
| NPI                                            | 5.29 +/- 0.11 | 5.10 +/- 0.06 | p=0.1   |

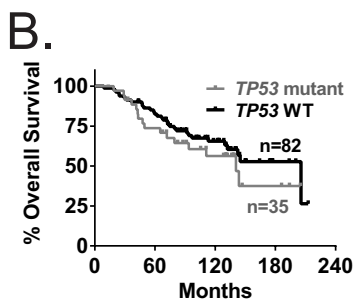

| Chemo/Rad treated, ER+                         |               |               |         |
|------------------------------------------------|---------------|---------------|---------|
| Survival: Log-rank p=0.2906; Wilcoxon p=0.3219 |               |               |         |
|                                                | TP53 WT       | TP53 mut      | p-value |
| n                                              | 82            | 35            |         |
| Grade                                          | 2.52 +/- 0.07 | 2.69 +/- 0.08 | p=0.2   |
| Tumor Stage                                    | 2.09 +/- 0.05 | 2.10 +/- 0.08 | p=0.9   |
| Tumor Size                                     | 33.2 +/- 2.7  | 36.2 +/- 4.8  | p=0.6   |
| NPI                                            | 4.82 +/- 0.11 | 4.87 +/- 0.15 | p=0.8   |

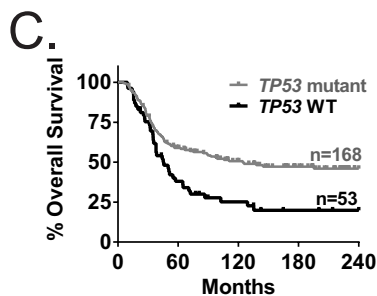

| Chemo treated, no HT                           |               |               |         |
|------------------------------------------------|---------------|---------------|---------|
| Survival: Log-rank p=0.0009; Wilcoxon p=0.0061 |               |               |         |
|                                                | TP53 WT       | TP53 mut      | p-value |
| n                                              | 53            | 168           |         |
| Grade                                          | 2.85 +/- 0.06 | 2.90 +/- 0.02 | p=0.3   |
| Tumor Stage                                    | 2.36 +/- 0.07 | 2.11 +/- 0.04 | <0.05   |
| Tumor Size                                     | 38.1 +/- 3.3  | 30.6 +/- 1.6  | <0.05   |
| NPI                                            | 5.20 +/- 0.12 | 5.03 +/- 0.05 | p=0.12  |

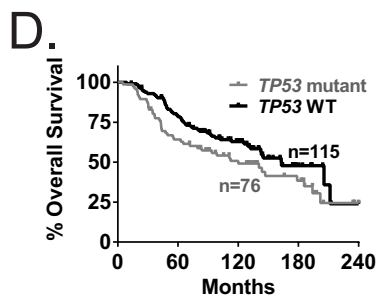

| Chemo treated, HT treated                      |               |               |         |
|------------------------------------------------|---------------|---------------|---------|
| Survival: Log-rank p=0.0747; Wilcoxon p=0.0298 |               |               |         |
|                                                | TP53 WT       | TP53 mut      | p-value |
| n                                              | 115           | 76            |         |
| Grade                                          | 2.54 +/- 0.06 | 2.80 +/- 0.05 | <0.005  |
| Tumor Stage                                    | 2.11 +/- 0.05 | 2.13 +/- 0.06 | p=0.8   |
| Tumor Size                                     | 32.0 +/- 2.0  | 32.4 +/- 2.8  | p=0.9   |
| NPI                                            | 4.76 +/- 0.10 | 5.03 +/- 0.11 | p=0.08  |

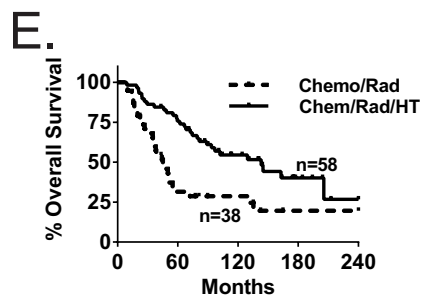

| TP53 WT Chemo/Rad treated, Grade 3             |               |               |         |
|------------------------------------------------|---------------|---------------|---------|
| Survival: Log-rank p=0.0006; Wilcoxon p<0.0001 |               |               |         |
|                                                | No HT         | HT            | p-value |
| n                                              | 38            | 58            |         |
| Grade                                          | 3             | 3             | n/a     |
| Tumor Stage                                    | 2.39 +/- 0.08 | 2.16 +/- 0.06 | <0.005  |
| Tumor Size                                     | 34.6 +/- 3.5  | 33.4 +/- 3.0  | p=0.8   |
| NPI                                            | 5.46 +/- 0.03 | 5.07 +/- 0.11 | p=0.3   |
